# Supplementary material for: Phosphorylation of SOS1 on tyrosine 1196 promotes its RAC GEF activity and contributes to BCR-ABL leukemogenesis
Source: PubMed Central journal article supplement — Leukemia. 2017 Sep 12;32(3):820–7. doi: 10.1038/leu.2017.267 (PMC5739283; doi:10.1038/leu.2017.267), 2017-09-12
Supplement: NIHMS73768-supplement-Supplementary_Material.pdf [file NIHMS73768-supplement-Supplementary_Material.pdf]

## 1 **Supplementary Material**

### 2 **1. Supplementary Methods**

### 3 **2. Supplementary legends to Figures and Movie**

4

## 5 **Supplementary Methods**

6

### 7 **Constructs and plasmids**

8 The following expression vectors were described elsewhere: ABL- $\Delta$ SH3, ABL,  
9 pCEFL Ha-SOS1, ABI1 <sup>1</sup>, myc-EPS8 <sup>2</sup>, GST-SH3-GRB2 (N-terminal) <sup>3</sup>, His-PxxP-  
10 SOS1, GST-CRIB <sup>4</sup>. BCR-ABL and BCR-ABL mutant resistant to STI 571 were a  
11 gift from Justus Duyster's laboratory, His-DH PH Tiam1 was a gift from John  
12 Sondek's laboratory, GFP-BCR-ABL was a gift from Rick Van Etten laboratory,  
13 pMFG-HA-mSOS1 (used for the reconstitution of SOS1<sup>-/-</sup> fibroblasts) was a gift  
14 from Egan laboratory, GFP-VAV-DN was a gift from Xosé Bustelo laboratory.  
15 SOS1-Y1196F was generated by recombinant PCR. GST-RAC1 and His-RAS were  
16 described previously <sup>5</sup>. DH-CDC25-pProEx-Hisb was a gift from J. Kuriyan. GST  
17 and Histidine bacterial expression vectors carrying various SOS1 fragments (GST-  
18 Histon-fold, GST-DH, GST-DH-PH, GST- H-DH, GST-H-PH, His- H-CDC25) were  
19 generated by recombinant PCR and cloned into pGEX-6p1 or pTRC-HisA,  
20 respectively.

21

### 22 **Reagents and antibodies**

23 The following antibodies were used: anti-SOS1, anti-Hemoglobin and anti-ABL  
24 (Santa Cruz Biotechnology, Santa Cruz, CA), anti-ABI1 was generated against the  
25 peptide N-PPVDYEDDEEA VVQYNDPYADGDPAWAPKNYI-C <sup>6</sup>; the following

26 mouse monoclonal antibodies were used: anti-RAC (Transduction Laboratories,  
27 Lexington, KY) and anti-Ha (12CA5, Covance, Princeton, NJ), anti-pTyr (Upstate  
28 Biotechnology, Lake Placid, NJ), anti-pY412-ABL (Abcam, Cambridge, UK), anti-  
29 Myc 9E10 (Babco, Berkeley, CA), anti-Tubulin (Sigma-Aldrich, St. Louis, MO), anti-  
30 pAKT, anti-MAPK, anti-pMAPK (Cell Signaling, Boston, MA). Biotinylated SOS1  
31 phosphorylated and non-phosphorylated peptide (KAYSPR(pY)SISDRT) were  
32 purchased from Cambridge Research Biochemicals Limited (Cleveland, UK). A  
33 monoclonal mouse antibody against pY1196 was generated using  
34 KAYSP(pY)SISDRT conjugated to KLH. The T-Cell protein tyrosine phosphatase,  
35 the T-Cell protein tyrosine phosphatase inhibitor and -were from New England  
36 Biolabs (Beverly, MA). Nitrocellulose plates were from Merck (Darmstadt,  
37 Germany), STI571 was a gift from Novartis Pharma AG (Basel, Switzerland),  
38 TRITC-phalloidin was from Molecular Probes (Eugene, OR), PDGF was from  
39 Immunological Sciences (Rome, Italy), Heregulin was from R & D Systems  
40 (Minneapolis, MN), EGF was from Peprotech (London, UK), Annexin V and  
41 Propidium Iodide were from Sigma-Aldrich (St. Louis, MO), 2'-(or-3')-O-(N-  
42 methylanthraniloyl)guanosine 5'-diphosphate, disodium salt (MANT-GDP) was from  
43 Invitrogen (Milano, Italy), [<sup>3</sup>H]-GDP was from Amersham. Methylcellulose  
44 MethoCult #3434 was from StemCell Technologies (Vancouver, BC, Canada).  
45 Recombinant murine Interleukin-3 (IL-3), IL-6 and SCF were purchased from R&D  
46 System (Minneapolis, MN, USA). Hanks' Balance Salt Solution (HBSS 1X) was  
47 from Sigma-Aldrich (St. Louis, MO). Tamoxifene was from Calbiochem (San Diego,  
48 CA, USA).  
49 5-Fluorouracil (5-FU) was from Sigma-Aldrich (St. Louis, MO, USA). Anti B220,  
50 anti Tyr 1.2, anti GR-1 and anti Mac-1 were from eBioscience (San Diego, CA,

51 USA). IMDM (Iscove's Modified Dulbecco's Medium) was from Sigma-Aldrich (St.  
52 Louis, MO).

53

#### 54 **Mass spectrometry**

55 In-gel digestion. Immunoprecipitated SOS1 was *in vitro* phosphorylated and  
56 separated by SDS PAGE. The protein was reduced and alkylated by 20 mM DTT for  
57 30 min at RT and 50 mM iodoacetamide for 30 min at RT in the dark, respectively.  
58 Digestion was carried out by adding 12.5 ng/ $\mu$ l of trypsin in 25mM  $\text{NH}_4\text{HCO}_3$   
59 (Proteomics Grade, Sigma). Peptides were acidified to 2% of TFA prior to loading  
60 onto a StageTip<sup>30</sup>. Peptides bound to C18 phase were eluted in 10  $\mu$ l of buffer B (80%  
61 acetonitrile, 0.5% acetic acid) and lyophilized. Lyophilized peptides were re-  
62 suspended in buffer B containing 300mg/ml DHB to selectively enrich  
63 phosphopeptides<sup>31</sup> and loaded onto a self-packed Gelloader tip (Eppendorf, Hamburg,  
64 Germany) plugged with C18 material (3M Empore<sup>TM</sup> C<sub>8</sub> disk, 3M Bioanalytical  
65 Technologies, St. Paul, MN), filled with 2mm of TiO<sub>2</sub> beads (GL Sciences Inc.  
66 Tokyo, Japan). Eluted peptides with 10  $\mu$ l of  $\text{NH}_4\text{OH}$ , pH 10.5 were analysed by  
67 nanoLC-MS/MS. LTQ-FT mass spectrometer (ThermoElectron, Bremen, Germany)  
68 coupled online to an Agilent 1100 binary nano pump (Palo Alto, CA). To prepare an  
69 analytical column with a self-assembled particle frit, C<sub>18</sub> material (ReproSil-Pur C18-  
70 AQ 3 $\mu$ m; Dr. Maisch GmbH, Ammerbuch-Entringen, Germany) was packed into a  
71 spray emitter (75  $\mu$ m ID, 8  $\mu$ m opening, 70 mm length; New Objectives, USA) using  
72 an air-pressure pump (Proxeon Biosystems, Odense, Denmark). The column was  
73 equilibrated with solvent A (2% acetonitrile and 0.1% formic acid). Bound peptides  
74 were eluted using a 160-min linear gradient (from 0 to 30% [vol/vol]) of solvent B  
75 (80% acetonitrile and 0.085% formic acid) at a 150-nl/min flow rate. The six most

76 intense peaks of the MS scan were selected in the ion trap for MS (Normal scan,  
77 wideband activation, filling 5e5ions for MS scan, 10<sup>4</sup> ions for MS2, maximum fill  
78 time 100 ms, dynamic exclusion for 180 seconds). Raw-files were processed using  
79 DTA-supercharge (msquant.sourceforge.net). The generated peak lists were searched  
80 against the IPI human database using Mascot 2.0 with the parameters: monoisotopic  
81 masses, 5 ppm on MS and 0.5 Da on MS/MS, ESI TRAP parameters, fully tryptic  
82 specificity, cysteine carbamidomethylated as fixed modification, phosphorylation on  
83 Serine, threonine and Tyrosine, oxidation on methionine and protein N-acetylation as  
84 variable modifications. Three missed cleavage sites were allowed. The pY containing  
85 peptide was not identified automatically by Mascot search since it was below the  
86 automatically-assigned, statistically significant threshold of 20. We than searched the  
87 unassigned MS/MS dataset for spectra containing pTyr immonium ion at m/z  
88 216.043<sup>32, 33</sup> and subsequently sequenced manually the peptide of 410.665 (doubly  
89 charged) mass corresponding to pYSISDR.

90

### 91 **Mice strains**

92 All animal experiments were approved by the OPBA (Organisms for the well being of  
93 the animal) of IFOM and Cogentech. All experiments complied with national  
94 guidelines and legislation for animal experimentation. All mice were bred and  
95 maintained under specific pathogen-free conditions at IFOM animal facility.

96 The generation of a Tamoxifen inducible *Sos1*<sup>-/-</sup> mice strain was previously  
97 described<sup>34</sup>. Briefly, a strain harboring a floxed version of *Sos1* with LoxP sites  
98 flanking exon 10 (*Sos1*<sup>fl/fl</sup>)<sup>35</sup> was crossed with mice expressing a TAM-inducible Cre  
99 recombinase downstream of the RERT (Jackson Laboratories; stock number 017585)  
100 This strain expresses an inducible Cre-ERT2, Cre recombinase fused to a triple

101 mutant form of the human estrogen receptor, from the endogenous and ubiquitous  
102 Polr2a locus promoter and was used to generate homozygous *Sos1<sup>fl-Cre</sup>/Sos1<sup>fl-Cre</sup>* mice.

103 Experiments with primary cells are described in details in Supplementary Methods

104

#### 105 **Statistical Analysis.**

106 Differences between experimental groups were examined for statistical significance

107 using the paired Student's *t*-test, unless otherwise indicated. Data are expressed as

108 mean  $\pm$  s.e.m.

109

#### 110 **Cell culture and cell biological assays**

111 All cells were provided by IFOM cell culture facility and their identity verified by  
112 finger printing. 32D-BCR-ABL cells were a gift from Skorski laboratory.

113 K562, SOS1<sup>-/-</sup> MEF, and 293T Phoenix cells were grown in Dulbecco's modified  
114 Eagle's medium (DMEM, Life Technologies, Inc.) supplemented with 10% fetal  
115 bovine calf serum (FCS), 100  $\mu$ g/ml streptomycin, 100  $\mu$ g/ml penicillin and 2 mM  
116 glutamine.

117 MDA-MB-231, MDA-MB-453 cells were grown in Leibovitz L15 (Leibovitz L15,  
118 Gibco) supplemented with 10% fetal bovine calf serum (FCS), 100  $\mu$ g/ml  
119 streptomycin, 100  $\mu$ g/ml penicillin and 2 mM glutamine. Medium for MDA-MB-435s  
120 contained further 10 $\mu$ g/ml Insulin.

121 Transfections were performed using either calcium phosphate or Lipofectamine  
122 (Invitrogen, Carlsbad, CA, USA) reagents, according to manufacturer's instructions.

123 Lipofectamine reagent was used for biochemical studies in MEF cells.

124 Stable KD of SOS1 was generated in K562 cells by retroviral infection using a

125 pSuperRetro-Puro vector carrying the following short hairpin oligos: 256

126 (gcaatagctgatgcccaatca), 1640 (ggagtacactggaaaggatgc), 3347  
127 (gcacagcatctgcaccaaact) specific for human SOS1. SOS1 <sup>-/-</sup> mouse embryo  
128 fibroblasts were reconstituted with pMFG-Ha-mSOS1 WT or Y1196F by retroviral  
129 infection. Preparation of primary derived BMDC from WT and retroviral infection of  
130 with pMig-210-BCR-ABL is described below.

### 131 **Proliferation assay**

132 Equal amounts of K562 (wild type or SOS1-KD) cells (50.000 cell/ml) were cultured  
133 in the absence or presence of 10 $\mu$ l STI571 or 10% of WEHI conditioned medium as a  
134 source for Interleukin 3. Cells were counted with standard counting chambers after  
135 48h in the presence of Trypan Blue.

### 136 **Apoptosis assay**

137 Equal amounts of K562 (wild type or SOS1-KD) cells (50.000 cell/ml) were cultured  
138 in the absence or presence of 10  $\mu$ M STI571 or 10% of WEHI conditioned medium as  
139 a source for Interleukin 3. Cells were harvested after 24h and washed with Annexin  
140 buffer (10mM HEPES pH 7.5, 150mM NaCl, 1mM MgCl<sub>2</sub>, 3.6mM CaCl<sub>2</sub>, 5mM KCl).  
141 Cells were re-suspended in 50  $\mu$ l AnnexinV-FITC (diluted 1:50 with Annexin buffer).  
142 After 1h incubation at room temperature in the dark, cells were washed once with  
143 Annexin buffer. Cells were re-suspended in 500  $\mu$ l PBS and 1  $\mu$ l Propidium Iodide  
144 (stock 50  $\mu$ g/ml) was added and immediately processed for FACS analysis.

### 145 **Cell lysates, immunoprecipitations and immunofluorescence**

146 Whole Cell Lysates: After washing with PBS, cells were lysed in lysis buffer [50 mM  
147 HEPES PH 7.5, 50 mM NaCl, 1% glycerol; 1% Triton X-100, 1.5 mM MgCl<sub>2</sub>. 5 mM  
148 EGTA plus protease inhibitor cocktail (Roche, Basel, Switzerland), 1 mM DTT, 20  
149 mM Na pyrophosphate pH 7.5, 50 mM NaF, 0.5 M Na-vanadate in HEPES pH 7.5 to  
150 inhibit phosphatases] directly on plates using a cell-scraper. About 200  $\mu$ l of lysis

151 buffer buffer/10 cm plates was used. Lysates were incubated on ice for 10 minutes  
152 and spun at 12000 rpm for 10 min at 4°C. Total protein concentration was measured  
153 by the Bradford assay (Biorad, Berkely, CA, USA), following manufacturer's  
154 instructions.

155 Immunoprecipitation: Protein A Sepharose beads (Sigma, for rabbit polyclonal  
156 antibodies) or protein G Sepharose beads (Zymed, for mouse monoclonal antibodies)  
157 were added, and samples were left for an additional hour at 4°C, rocking.  
158 Immunoprecipitates were then washed four times in lysis buffer. After washing, beads  
159 were re-suspended in 1:1 volume of 2x SDS-PAGE Sample Buffer, boiled for 5  
160 minutes at 95°C, and loaded onto polyacrylamide gels.

161 Western blotting was carried out as described <sup>1</sup>. Immunofluorescence: Cells plated on  
162 glass coverslips were pre-incubated with 0.5% gelatin in PBS at 37°C for 30 minutes  
163 and fixed in 4% paraformaldehyde (in PBS) for 10', permeabilised in PBS 0,1%  
164 Triton X-100 for 10 minutes at room temperature, blocked with 2% BSA for 30 min,  
165 and then incubated with primary and secondary antibodies for 45 and 30 min,  
166 respectively. F-actin was detected by staining with FITC-conjugated phalloidin  
167 (Sigma-Aldrich) at a concentration of 6.7 U ml<sup>-1</sup>.

168 Immunohistochemistry: Formalin-fixed and paraffin-embedded of agarose cell-blocks  
169 prepared with  $\Delta$ SH3ABL with SOS1 or  $\Delta$ SH3ABL with SOS1Y1196F co-  
170 overexpressing Phoenix cells was performed as described <sup>7</sup>. Epitope unmasking was  
171 carried out in 0.25 mM EDTA, slides were incubated overnight at +4°C with primary  
172 anti-SOS1pY1196 antibody diluted 1:25 followed by detection HRP-conjugated  
173 secondary antibodies were used. Samples were developed with DAB and were  
174 counterstained with hematoxylin.

175 **Soft agar assay**

176 Difco Agar (3 g) was dissolved in 100 ml water and kept at 50°C. DMEM containing  
177 25% fetal bovine calf serum (FCS) was kept at 40°C. Two volumes of Agar were  
178 mixed with 8 volumes of DMEM+FCS to a final concentration of 0.6% Agar and  
179 20%FCS in DMEM. 2 ml were poured in a 6well plate and allowed to solidify.  
180 100.000 cells in a volume of 0.9 ml DMEM (with or without STI571 or 10% WEHI  
181 conditioned medium as a source for Interleukin3) were mixed with 0,1 ml of Agar and  
182 poured over the already solidified Agar basis. The final concentration of Agar in the  
183 cell containing top layer is 0.3%. After the solution has been cooled down to room  
184 temperature, the plate was transferred to the 37°C incubator. After 14 days Colonies  
185 were photographed.

186 Methyl-cellulose, instead of Agar, was used for colony formation assays of primary  
187 BMCs infected with BCR-ABL<sup>8</sup> (see also below).

188

## 189 **Biochemical assays**

### 190 ***In Vitro* Kinase assay**

191 The in vitro kinase assay was performed according to the manufactures protocol (New  
192 England Biolabs). Briefly, immunoprecipitated SOS1 or purified proteins (2µM) were  
193 incubated with 22nM ABL and 100µM ATP for 30min at 30°C. The final reaction  
194 volume was 50µl. After the reaction mixture was subjected to SDS-Page and  
195 immunoblotting.

### 196 **Phosphopeptide mapping**

197 The phosphopeptide mapping was performed as described<sup>9</sup>. Briefly, SOS1 or  
198 SOS1Y1196F were transfected in Phoenix, immunoprecipitated and in vitro  
199 phosphorylated with [<sup>32</sup>P]-ATP by ABL. The reaction mixture was subjected to SDS-  
200 PAGE and Western blot. After Ponceau-S staining the corresponding SOS1 bands



201 were cut out and placed in 0.5% Polyvinylpyrrolidone360 in 100mM Acetic Acid for  
202 30min at 37°C. After washing the membrane extensively with H<sub>2</sub>O and with 50mM  
203 NH<sub>4</sub>HCO<sub>3</sub>, the proteins were digested with Trypsin. Dried peptides were oxidized in  
204 freshly made performic acid and dried again. After resuspension in H<sub>2</sub>O, the labeled  
205 peptides were spotted onto a cellulose thin layer plate. The peptides were resolved in  
206 an electric field (1kV) for 20min in a pH8.9 ammoniumcarbonate buffer. After air-  
207 drying the plate, the peptides were separated in the second dimension by subjecting  
208 the plates to a thin layer chromatography in phosphochromobuffer (75 vol n-Butanol,  
209 50 vol Pyrridine, 15 vol Acetic Acid and 60vol H<sub>2</sub>O). The dried plates were analyzed  
210 by Phosphoimager standard procedures.

#### 211 **Purification of phosphorylated pY1196 SOS1**

212 Lysates (200 mg) of 293T Phoenix cells transfected with HaSOS1 and ΔSH3-ABL  
213 were incubated with GST-SH3-Grb2 (190nmol). Bound proteins were eluted with 240  
214 nmol of His-PxxP-SOS1. Soluble, phosphorylated SOS1 was immunoprecipitated  
215 with 900 µg (5,4 nmol) of antibody against pY1196 SOS1 and eluted with 100 nmol  
216 of phosphorylated pY1196-containing peptide. See also **Fig. 3**.

#### 217 **GEF Assays with <sup>3</sup>H-GDP**

218 *In vitro* GEF activity of SOS1 purified from mammalian cells toward H-Ras or Rac1  
219 was performed in the presence of <sup>3</sup>H-GDP, exactly as described <sup>1</sup>. Data are averages  
220 (with standard deviations) of at least three independent experiments performed in  
221 triplicate. Results are expressed as <sup>3</sup>H-GDP released after 20 min relative to time zero.  
222 Control reactions were obtained by incubating <sup>3</sup>H-GDP-loaded Rac either in exchange  
223 buffer or in the presence of the non-related protein, bovine serum album (BSA).

#### 224 **GEF assay with Fluorescent Mant-GDP**

225 The reaction was performed as described <sup>10</sup>. Briefly, the reaction conditions were  
226 25mM Tris HCl pH 7.6, 100mM NaCl, 10mM MgCl<sub>2</sub>, 1mM DDT, 2μM MANT-  
227 GDP, 5μM GST-RAC and the DH-PH of Tiam1 (1μM) or purified pY1196-SOS1 (30  
228 and 120 μl purified protein corresponding to 2nM or 8nM, respectively) in a final  
229 reaction volume of 200μl. The reaction containing all reagents except for the GEFs  
230 was allowed to equilibrate for about 500s. Fluorescence emission was monitored  
231 using a Safax flx fluorimeter using the following conditions: λ<sub>ex</sub>: 360nm, λ<sub>em</sub>:  
232 440nm, slits 5/5nm. Data are representative of at least three independent experiments.

233

#### 234 **RAC-GTP Crib Assay**

235 The crib assay was performed as described <sup>11</sup>. Briefly, 1 mg of cell lysate was  
236 incubated with 30ug of purified GST-CRIB for 1h at 4°C. Beads were washed 3 times  
237 with lysis buffer and subjected to SDS-Page with following immunoblotting for RAC.

#### 238 **Transduction of murine bone marrow derived cells and methylcellulose re-** 239 **plating assays**

240 C57BL/6 or TAM-inducible Cre recombinase SOS1<sup>fl/fl</sup> mice <sup>12</sup>, 12 weeks of age,  
241 were treated with 5-FU (150mg/Kg). After 4 days the mice were sacrificed, and bone  
242 marrow (BM) was collected by flushing as described <sup>13</sup>. Briefly, BM cells were pre-  
243 stimulated overnight in BBMM medium (IMDM, 30% fetal calf serum, 1% bovine  
244 serum albumin, 10ng/ml mIL-3, 10ng/ml mIL-6, 50ng/ml mSCF) were infected by  
245 four rounds of spin infection with pMigBCR-ABL<sup>p210</sup> IRES GFP and plated in  
246 methylcellulose MethoCult #3434 (StemCell Technologies, Vancouver, BC, Canada)  
247 in the absence or presence of tamoxifen (100 nM) to induce SOS1 deletion. EGFP<sup>+</sup>  
248 BMCs (0.5–1 × 10<sup>3</sup>) in 1 ml of methylcellulose medium per 12 wells were plated in  
249 duplicates or quadruplicates and the colonies were photographed and counted on day

250 9. For Re-plating assays, Colonies were washed out of the MC, counted and 10.000 or  
251 5.000 cells were re-plated in duplicates and the colonies were photographed and  
252 counted on day 10 after seeding.

253

#### 254 **Transplantation assays**

255 After transduction of BMDCs with pMigBCR-ABL<sup>p210</sup> 20.000 sorted GFP<sup>+</sup> and  
256 180.000 Support BMDC/ per mice cells were transplanted into lethally irradiated  
257 recipient mice. For Homing/Engraftment assays, BMDC of recipient mice were  
258 harvested 24 hours after transplantation and analyzed for GFP-positive cells by FACS  
259 analysis. Mice were treated with TAM (1 mg in peanut oil/ 25 g body weight) or  
260 solvent at day 1 and 2 after intra-peritoneal transplantation. Peripheral blood of mice  
261 was taken at the indicated time points and WBCs were measured automatically (ABC  
262 scil vet) to monitor leukemia induction. Leukemic burden was measured by GFP-  
263 FACS analyses of peripheral blood at indicated time points. For  
264 Hematopoietic/Leukemic stem cell analyses, spleen cells of leukemic mice were  
265 harvested and stained for lineage marker (CD4, CD8, CD3e, B220, Ter119, Gr1,  
266 CD11b), cKit, Sca1, CD150 and CD48 and analyzed by FACS. Stem cells were  
267 expected to be alive, EGFP<sup>+</sup>Lin<sup>-</sup>Sca1<sup>+</sup>cKit<sup>+</sup> or EGFP<sup>+</sup>Lin<sup>-</sup> and/or CD150<sup>+</sup>CD48<sup>-</sup>  
268 cells.

269

#### 270 **Xenotransplantation of K562 cells into immunocompromised mice**

271 An equal number ( $5 \times 10^5$ ) of control and SOS1-KD K562 cells were injected into the  
272 tail vein of immunocompromised NOD/SCID (NOD.Cg-Prkdc<sup>scid</sup> Il2rg<sup>tm1Wjl</sup>/SzJ)  
273 mice. After injection mice were weighed and monitored daily for sickness and tumor  
274 formation. Mice were monitored for up to 60 days and were euthanized when

275 approximately 20% of total body weight was lost or display impairment in eating or  
276 walking. Single cell suspensions were stained for FACS with glyA PE (GA-R2) (BD  
277 biosciences) to detect tumour cells (not shown).

278

279

280 **Supplementary Figures and Movie Legends**

281 **Figure S1. Mapping of the minimal region of SOS1 tyrosine phosphorylated by**  
282 **ABL kinase.**

283 A. *Left Panels:* full length SOS1 was immunopurified with anti-SOS1 abs from  
284 lysates of mammalian cells ectopically expressing SOS1. Irrelevant IgG-beads were  
285 used as control (Ctr). *Middle and right panels:* SOS1 fragments were produced in  
286 bacteria and purified by affinity chromatography with either Nickel-NTA (His-1-  
287 CDC25, H-CDC25; and His-PxxP, PxxP,) or with Glutathione-sepharose beads  
288 (Histone-fold, H; DH, DH-PH, H-DH-PH). SOS1 full length and various fragments  
289 were subjected to ABL kinase assay or mock treatment (Ctr). Typically, 2  $\mu$ M of each  
290 recombinant protein was used. After the kinase reaction, the proteins were separated  
291 by SDS-Page and detected either with anti-SOS1 antibody, in the case of full length  
292 SOS1 (*Left panels*), or by PonceauS staining. Membranes were immunoblotted with  
293 anti-pY abs (IB). As positive control (Control) of ABL kinase reaction a GST-fused-  
294 fragment (aa: 1-285) of ABI1 (GST-ABI1), a known interactor of ABL<sup>57</sup>, was used.  
295 B. A scheme of the various SOS1 fragments with their amino acid boundaries and  
296 domain organization and their tyrosine phosphorylation status after ABL kinases is  
297 shown.

298 C. Lysates (1 mg) of 293T cells transfected with WT-SOS1 or Y1196F-SOS1  
299 together with ABL- $\Delta$ SH3 were immunoprecipitated (IP) using an anti-SOS1  
300 antibody. Lysates (20  $\mu$ g) and IP were separated by SDS-Page and analyzed by  
301 immunoblotting with the indicated antibodies (Ab).

302

303 **Figure S2. Development and characterization of mouse monoclonal anti-pY1196**  
304 **SOS1 antibodies**

305 A. Summary table of pY1196 SOS1 monoclonal antibody production. We obtained 43  
306 different hybridomas. Supernatants from either the mass population (First Fusion on  
307 the right), or from individual clones (Clones, on the left) of hybridomas were initially  
308 tested by Elisa, using either Y1196-phosphorylated or non-phosphorylated-containing  
309 biotinylated peptides. Antibodies displaying specific binding to phosphorylated  
310 peptides (color labeled) were further tested by immunoblotting (IB on lys) and  
311 immunoprecipitation (IP) on lysates of cells expressing either SOS1, or SOS1 and  
312 ABL- $\Delta$ SH3, or Y1996F-SOS11 and ABL- $\Delta$ SH3 (See also Figure 2B-C). Selected  
313 hybridomas were further tested for their ability to immunoprecipitate phosphorylated  
314 pY1196-SOS1, but not unphosphorylated WT-SOS1 or Y1196F-SOS1 (See Fig. 2B-  
315 D). Finally, some fusions were tested in immunofluorescence (IF on Oex) and  
316 immunohistochemistry on cell expressing various combination of WT-SOS1,  
317 Y1196F-SOS1 together with activated ABL- $\Delta$ SH3. The most promising mass  
318 populations of hybridomas were sub-cloned (color labeled, but not yellow) (BS12,  
319 BI20, BD7, AFG12, VP20, TR16, TR54, TF7). Only TR16 (grey) and TF7 (light  
320 orange) clones remained positive during the cloning procedure. TR16 clones  
321 produced monoclonal antibody efficient for immunohistochemistry. TF7 clones  
322 produced antibodies for immunoblotting, immune-precipitations (see also Fig. 2B-D)  
323 and immunofluorescence analysis. The specific strength of binding of the antibodies  
324 to the phosphorylated peptide is indicated with + (+ = low binding, +++++ = high  
325 binding, - = no specific binding).

326 B. Example of the efficacy of the monoclonal antibody obtained from clone TR16 in  
327 detecting pY1196-SOS1 by immunohistochemistry (Left images) and  
328 immunofluorescence (Right images). Left images, Phoenix cells were transfected with  
329 either WT-SOS1 or Y1196F-SOS1 together with ABL $\Delta$ SH3, paraffin embedded and

330 processed for immunohistochemistry analysis using an anti-pY1196 SOS1 ab (TR16  
331 clone) and an ABL ab. Bar, 50  $\mu$ m. Right images, mouse embryo fibroblasts were  
332 transfected with WT-SOS1 or Y1196F-SOS1 together with GFP-BCR-ABL. Cells  
333 were fixed and stained with an anti-p1196Y-SOS1 or anti-total SOS1 ab. Bar, 20  $\mu$ m.

334

335 **Figure S3. SOS1 is tyrosine phosphorylated *in vivo* on Y1196**

336 A. Lysates of 293T cells, transfected with ABL- $\Delta$ SH3, HA-WT-SOS1 and HA-  
337 Y1196F-SOS1 as indicated, were immunoblotted with anti-ABL, anti-SOS1 and anti  
338 pY1196-SOS1 Abs. HA-immunoprecipitates were immunoblotted with anti-SOS1  
339 and the phosphospecific anti-pY1196 ab. pY1196-SOS1 was immunoprecipitated  
340 with anti-pY1196-SOS1 ab. The immunoprecipitated tyrosine phosphorylated SOS1  
341 was detected by immunoblotting using an anti-HA ab, to prevent the detection of  
342 endogenous phosphorylated SOS1.

343 B. Serum starved *Sos1*<sup>-/-</sup> Mouse embryo Fibroblasts (MEFs), reconstituted with  
344 murine HA-SOS1, were stimulated with 30 ng/ml PDGF for 7 minutes. Lysates and  
345 SOS1 immunoprecipitates were immunoblotted with the indicated abs.

346 Breast cancer cells, MDA-MB-353 and MDA-MB231, were starved overnight and  
347 treated with 10  $\mu$ m of STI571 or vehicle as a control for 1h, before adding the  
348 indicated ligands [Heregulin (Hrg\_ = 160 ng/ml) or Epidermal growth factor (EGF =  
349 100 ng/ml)] for 7 minutes. Lysates (20  $\mu$ g) and SOS1 immunoprecipitates were  
350 immunoblotted with the Abs indicated on the right.

351

352 **Figure S4. Purification scheme of phosphorylated pY1196F-SOS1 (related to**  
353 **Figure 2).**

354 A. Phosphorylation of Y1196 triggers RAC, but not RAS GEF activity. Lysates (1mg)  
355 from 293T cells transfected with WT- or Y1196F-SOS1 together with  $\Delta$ SH3-ABL  
356 were immunoprecipitated using an anti-SOS1 antibody (See Supplementary Figure  
357 S3A). Equal amounts of immunopurified SOS1 were subjected to either *in vitro*  
358 RAC1 (A<sup>i</sup>) or H-RAS filter binding GEF assays using radiolabelled 3[H]-GDP (A<sup>ii</sup>).  
359 The assays were performed in triplicates. Data are the mean  $\pm$  s.e.m. (n = 4). Student  
360 T-test, \* =  $P < 0.001$ . The RAC1 or H-RAS GEF reactions mix were also resolved on  
361 SDS-PAGE (See S3A, bottom panel) and stained with PonceauS to compare the  
362 amounts of SOS1 used in each assay.

363 B. Purification of tyrosine phosphorylated SOS1 and Y1996F mutant from cells co-  
364 expressing activated ABL. Lysates (1mg) from 293T cells transfected with WT- or  
365 Y1196F-SOS1 together with  $\Delta$ SH3-ABL were immunoprecipitated using an anti-  
366 SOS1 antibody. Equal amounts of immunopurified SOS1 were subjected to either *in*  
367 *vitro* GEF assays for RAC1 and H-RAS as described in Figure 3. The lysates (20  $\mu$ g)  
368 and immunoprecipitates were immunoblotted with the Abs indicated on the right or  
369 stained with PonceauS. On the bottom panel, the RAC1 or H-RAS GEF reactions mix  
370 were also resolved on SDS-PAGE and stained with PonceauS to compare the amounts  
371 of SOS1 used in each assay

372 C. On the right, a double-affinity purification scheme of tyrosine phosphorylated  
373 SOS1 is shown. Lysates (200 mg) of 293T cells transfected with HA-SOS1 and ABL-  
374  $\Delta$ SH3 were incubated with GST-SH3-GRB2 (190 nmol). Bound proteins were eluted  
375 with 240 nmol of His-PxxP-SOS1. Soluble, phosphorylated SOS1 was  
376 immunoprecipitated with 900  $\mu$ g (5.4 nmol) of immobilized antibody against  
377 pY1196-SOS1 and eluted with 100 nmol of phosphorylated peptide. 0.01% of the  
378 lysates before GRB2 binding (Input), 0.5% of the GRB2 pull down (SH3-GRB2),



379 0.5% of the His-PxxP-SOS1 eluted fraction (PxxP-SOS1), 0.5% of the His-PxxP-  
380 SOS1 not eluted fraction (not eluted), 0.5% of the fraction that didn't bind to the  
381 pY1196 antibody and 20 % of the final eluted pY1196 SOS1 were immunoblotted  
382 with the indicated Abs.

383

384 **Figure S5. SOS1 proline-rich region interacts directly with the DH-PH domain**  
385 **and mediates an inter-molecular interaction controlled by Y1196**  
386 **phosphorylation**

387 A. SOS1 proline rich region (PxxP) interacts with the DH-PH tandem motif. Equal  
388 amounts (10 pmol or 30 pmol) of various recombinant SOS1 fragments (Left panel:  
389 H, DH, DH-PH, DH-CDC25, H-CDC25, Right panel: DH-PH, PH, DH see also the  
390 schematic representation of the various fragments used in B) or BSA, as a control,  
391 were spotted onto nitro cellulose membrane. After incubation with 0.5  $\mu$ M  
392 recombinant His-PxxP in solution, the binding of the PxxP to the fragments was  
393 determined by immunoblotting using the anti-SOS1 antibody, which recognizes the  
394 proline-rich region of SOS1.

395 B. Scheme of the various SOS1 fragments and their binding ability to the proline rich  
396 region (PxxP) of SOS1. "+" indicates binding; "-" indicate that no binding was  
397 detected.

398 C. SOS1 proline-rich (PxxP) region and its DH-PH domain interact with an apparent  
399 micromolar affinity. *Left panels:* Equal molar amounts (20 pmol) of DH-PH domain  
400 or BSA (control) were spotted onto nitrocellulose membrane. After the incubation  
401 with increasing concentrations of recombinant His-PxxP, the fraction of bound PxxP  
402 to the DH-PH domain was determined by immunoblotting using an anti-SOS1  
403 antibody. *Right graph:* the apparent dissociation constant was determined (Kd) by

404 blotting the concentration of total PxxP against the bound fraction to the DH-PH  
405 domain. The half maximum binding was at  $\sim 2.8 \mu\text{M}$ . Data are the mean  $\pm$  s.e.m. (n =  
406 3 independent experiments).

407 D. Phosphorylation on Y1196 reduced the affinity of the PxxP of SOS1 for its DH-PH  
408 domain. *Left panels*, equal molar amounts (30 pmol) of SOS1 DH-PH domain or  
409 BSA, as a control, were spotted onto nitrocellulose membrane. Following incubation  
410 with increasing concentrations of phosphorylated or non-phosphorylated biotinylated  
411 peptides [amino acid sequence KAYSP(pY1196)SISDRT]. The amount of peptides  
412 bound to the DH-PH domain was determined using horseradish peroxidase  
413 conjugated to streptavidin. *Right graph*, the binding curves of the peptides are  
414 represented in the graph. The concentrations of the peptides were plotted against the  
415 amount of the peptides bound to the DH-PH domain. The maximum binding was set  
416 to 1. Data are the mean  $\pm$  s.e.m. (n = 3 independent experiments).

417 E. SOS1 form inter-molecular interaction that are disrupted by activated ABL.  
418 Lysates (3 mg) from 293T cells transfected with GFP-SOS1, HA-SOS1 and activated  
419 together with  $\Delta\text{SH3-ABL}$  were immunoprecipitated using an anti-GFP antibody.  
420 Lysate and IPs were immunoblotted with the indicated antibodies.

421 F. SOS1-Y1196F forms ABL-resistant dimers. Lysates (3 mg) from 293T cells  
422 transfected with GFP-SOS1-Y1196F, HA-SOS1-Y1196F and activated together with  
423  $\Delta\text{SH3-ABL}$  were immunoprecipitated using an anti-GFP antibody. Lysate and IPs  
424 were immunoblotted with the indicated antibodies.

425 G. SOS1-Y1196F acts as dominant negative. Lysates (3 mg) from 293T cells  
426 transfected with empty vector (-), or wild type SOS1, or SOS1-Y1196, or a DH—  
427 deficient mutant of SOS1 devoid of the proline rich region used as control were either  
428 immunoblotted (*top two panels*) with the abs indicated on the left or subjected

429 (*bottom panel*) to CRIB binding assays to detect RAC-GTP levels. Lysates and bound  
430 GTP-loaded RAC were immunoblotted with anti-RAC1.

431

432

433 **Figure S6. Effect of reconstitution of *Sos1*<sup>-/-</sup> MEF with WT- and pY1196F-SOS1**  
434 **(Related to Figure 3)**

435 A. Abl-mediated RAC1 activation requires SOS1. *Left panels*: lysates (1mg) from  
436 293T cells transfected with HA-WT- or HA-Y1196F-SOS1 in combination with  
437 activated  $\Delta$ SH3-ABL were either immunoblotted (IB) with the Abs indicated on the  
438 left or subjected (*Right panels*) to CRIB binding assays to detect RAC-GTP levels.  
439 Lysates and bound GTP-loaded RAC were immunoblotted with anti-RAC.

440 B. *Sos1*<sup>-/-</sup> MEF were reconstituted with HA-WT-SOS1 or HA-Y1196F-SOS1 (YF) or  
441 with the empty vector (Ctr), as control. Lysates (20  $\mu$ g) were immunoblotted with the  
442 indicated Abs.

443 C. Removal of SOS1 has no major impact on PDGF-induced MAPK or AKT  
444 signaling. Serum starved, *Sos1*<sup>-/-</sup> fibroblasts, reconstituted with either HA-WT- and  
445 HA-pY1196F-SOS1 or the empty vector (Ctr) were stimulated with 10 ng/ml of  
446 PDGF for the indicated time points. Lysates (20  $\mu$ g) were immunoblotted with the  
447 antibodies indicated on the right.

448 D. Total and Y1196 phosphorylated SOS1 localize to PDGF-induced circular dorsal  
449 ruffles. Serum starved *SOS1*<sup>-/-</sup> MEFs, reconstituted with HA-WT-SOS1 were  
450 stimulated with 10ng/ml of PDGF for 7 min. Cells were fixed and stained with an  
451 anti-pY1196 SOS1 abs (BD7), or anti-total SOS1 (anti-SOS1) or Tritc-Phalloidin to  
452 detect F-actin. Bar, 20  $\mu$ m.

453 E. VAV proteins are not involved in PDGF-induced circular dorsal ruffle (CDR)  
454 formation. *SOS1*<sup>-/-</sup> MEF were transfected with a dominant negative form of VAV  
455 (GFP-VAV DN) or an empty vector (GFP). Cells were starved for 12h, stimulated  
456 with 10 ng/ml of PDGF for 7 min, fixed and stained Tritc-Phalloidin to detect F-actin.  
457 The % of GFP-positive cells with CDR were counted. The expression of GFP or GFP-  
458 VAV DN did not affect the % of CDR formation. At least 100 cells were counted for  
459 each condition. The data represents the mean  $\pm$  s.e.m (n = 4 experiments). Right  
460 panel: Representative pictures of CDRs are shown. n.s. non-significant. Bar, 40  $\mu$ m.

461 F. Phosphorylation of SOS1 on Y1996 is required for directional migration. Serum  
462 starved *Sos1*<sup>-/-</sup> MEFs, reconstituted with control or HA-WT-SOS1 or HA-Y1196F-  
463 SOS1 or the empty vector (Ctr), were monitored by time lapse light field microscopy  
464 for 3.5 h, before adding 10 ng/ml of PDGF and further analyzed for 15 more hours.  
465 *Left grap*, velocity of cells was determined before and after the addition of PDGF by  
466 manually tracking cells using Image J software. The mean  $\pm$  s.e.m. velocity of at least  
467 50 cells is shown. The statistical relevance was determined by t-test and is indicated  
468 with \* (\*=0.0028; \*\*= 0.0005). *Right graph*, the circularity factor of cells treated with  
469 PDGF was determined with the help of Image J software by determining the ratio  
470 between long and short axis. To determine the mean value of circularity at least 50  
471 cells were measured. The statistical relevance was determined by t-test and is  
472 indicated with \* (\*=0.0326; \*\*=0.0009; \*\*\*=1.8320E-07; \*\*\*\*=1.3919E-05). See  
473 also Movie S1.

474

475 **Figure S7. SOS1 is phosphorylated in BCR-ABL leukemic blast (related to**  
476 **Figure 4)**

477 A. BCR-ABL expression in hematopoietic K562 and 32D cells. Total lysates (20µg)  
478 of BCR-ABL-expressing cells, K562, 32D-BCR-ABL and control 32D cells were  
479 immunoblotted with anti-ABL antibody. The slower-migrating band represents the  
480 isoform p210 BCR-ABL, while the faster-migrating band is endogenous ABL.

481 B. BCR-ABL mediates SOS1 phosphorylation on Y1196. SOS1 was  
482 immunoprecipitated from 1 mg of total cellular lysates of K562 and 32D-BCR-ABL,  
483 treated with 10 µM STI571 or vehicle for 1h. Lysates (20 µg) or immunoprecipitates  
484 were immunoblotted with the indicated Abs.

485 C. SOS1 loss does not affect ERK1/2 activity in K562 cells. K562 cells infected with  
486 pSuperRetroPuro Control vector (Ctr) or pSuperRetroPuro SOS1 interfering vector  
487 (SOS1-KD) were treated for 10 min with 10 µM STI571 or vehicle as control (Ctr).  
488 Lysates (20µg) from vehicle-treated or STI571-treated control cells and SOS1  
489 interfered K562 cells were immunoblotted to detect ERK1/2 phosphorylation.

490 D. shRNA-mediated knocked down of SOS1 in K562 cells does not cause apoptosis.  
491 Equal number (50.000 cells/ml) of K562 control cells (Ctr), STI571-treated,  
492 NSC2376-treated or SOS1-KD cells (SOS1 KD) were seeded into 6 well plates. After  
493 24 hours, cells were collected, fixed and stained with Annexin V. Cells were then  
494 analysed by FACS analysis. The percentage of cells, which is positive for Annexin V  
495 (Proapoptotic marker), was calculated. Data represents the mean±s.e.m of three  
496 independent experiments. \*\* P < 0.005.

497 E. shRNA-mediated stable SOS1 interference of K562 leads to the acquisition of  
498 erythrocytes features. Control (Ctr) or SOS1-KD K562 cells were extensively  
499 washed with PBS and pelleted by centrifugation. Control K562 cells have a white  
500 appearance, while the SOS1-interfered cells have a red appearance (*Upper panel*).

501 Lysates (20  $\mu$ g) of control (Ctr) or SOS1-KD K562 cells were immunoblotted with  
502 the Abs indicated on the right (*Lower panels*).

503

504 **Figure S8. Re-expression of shRNA-resistant WT, but not of Y1196F-SOS1 into**  
505 **SOS1-KD K562 cells restores proliferation, transformation and RAC activation**

506 A. RNAi-resistant WT-, but not Y1196F-SOS1 restores the levels of hemoglobin  
507 expression and RAC activation of SOS1-KD K562 cells. Control and SOS1-KD cells  
508 were stably infected with lentiviral vectors expressing either GFP or RNAi-resistant  
509 WT or Y1196F-SOS1. Lysates of the various K562 cells were immunoblotted with  
510 the Abs indicated on the right.

511 B. Lysates (20 $\mu$ g) from parental control K562 and SOS1-KD K562 cells re-  
512 expressing GFP or RNAi-resistant WT or Y1196F-SOS1 were incubated for 1h with  
513 20  $\mu$ g of GST-CRIB to pull down GTP-loaded RAC. Lysates (20  $\mu$ g) of the various  
514 K562 cells and bound proteins were immunoblotted with the Abs indicated on the  
515 right.

516 C. RNAi-resistant WT-, but not Y1196F-SOS1 restores cell proliferation of SOS1-  
517 KD k562 cells. An equal number (50.000 cells/ml) of control (Ctr), or SOS1-KD  
518 K562 cells re-expressing either GFP or shRNA-resistant WT or Y1196F-SOS1 were  
519 seeded. After various time points, cells were counted. Data are the mean $\pm$ s.e.m. of 4  
520 independent experiments. \*\*\*  $P < 0.001$  Student's t-test.

521 D. RNAi-resistant WT-, but not Y1196F-SOS1 restores K562 transformation. An  
522 equal number (100.000 cells/ml) of control (Ctr), or SOS1-KD K562 cells re-  
523 expressing either GFP or shRNA-resistant WT or Y1196F-SOS1 were plated in soft  
524 agar. Quantification of colony number is shown. At least 50 colonies were counted.

525 Data are the mean  $\pm$  s.e.m (n=3 independent experiments). \*\*  $P < 0.005$  Student's t-  
526 test.

527

528 **Figure S9. Characterization of control and *Sos1*<sup>fl/fl</sup> BMDC infected with BCR-  
529 ABL (related to Figure 5)**

530 A. *Sos1* loss impairs transformation. A<sup>i</sup>. 5-FU-enriched BM-derived progenitor cells  
531 from *Sos1*<sup>fl/fl</sup> and control mice were infected with pMigBCR-ABL<sup>p210</sup> retrovirus and  
532 plated in methylcellulose (MC) without growth factors in the absence or presence of  
533 tamoxifen to induce *Sos1* deletion as indicated. Representative photographs of  
534 methylcellulose colonies of *Sos1*<sup>fl/fl</sup> and control BMC infected with pMigBCR-  
535 ABL<sup>p210</sup>. Bar, 200  $\mu$ m. A<sup>ii</sup>. CFUs were quantified nine days after plating, results are  
536 shown from two independent experiments performed in duplicates and expressed  
537 relative to control *SOS1*<sup>fl/fl</sup>. P values were determined by Student t-test, \*\*\*  $P <$   
538 0.001. A<sup>iii</sup>. PCR-Analyses revealed correct deletion of *Sos1* in TAM-treated samples.  
539 DNA was prepared from BMC washed out of the MC 12 after seeding and PCR  
540 performed as described.

541 B. FACS analyses of BCR-ABL-infected bone marrow cells nine days after seeding  
542 in methylcellulose demonstrated mainly myeloid (Mac-1 and Gr-1-positive cells), but  
543 also some lymphoid cells (Thy1.2 and B220-positive cells) independently of *Sos1*  
544 deletion.

545 C. PCR-analyses revealed correct deletion of *Sos1* in TAM-treated animals. DNA was  
546 prepared from spleen cells of diseased animals.

547 D. Homing efficiency of BMDC with and without *Sos1* deletion in vivo. BMDC were  
548 harvested 24 hours after transplantation from 3 representative mice and subjected to  
549 flow cytometry. EGFP-positive cells from harvested BMDCs were compared in

550 relation to injected EGFP-positive BMDCs at transplantation. P-values were  
551 determined by Students t-test; n.s. non-significant

552 E-F. FACS analyses of BCR-ABL-positive spleen cells revealed no differences in  
553 leukemic stem cells (D, LSC) and CD150<sup>+</sup>/CD48<sup>-</sup> (E) stem cell level upon *Sos1*  
554 deletion. EGFP-positive spleen cells were harvested from leukemic mice and stained  
555 for lineage-markers c-kit, sca-1 (not shown) and CD150 and CD48. n.s. non-  
556 significant, Student t-test.

557 G. Re-plating efficiency was similar in *Sos1* deleted and control BMDCs after BCR-  
558 ABL infection. 5.000 or 10.000 BCR-ABL-infected BMCDs were re-plated nine days  
559 after first seeding in methylcellulose. Colonies were counted 10 days after re-plating  
560 and p-values were determined by Students t-test; n.s. non-significant

561

#### 562 **Movie S1**

563 Serum starved *Sos1* <sup>-/-</sup> MEFs, reconstituted with control or HA-WT-SOS1 or HA-  
564 Y1196F-SOS1 or the empty vector (Ctr), were monitored by time lapse light field  
565 microscopy for 3.5 h, before adding 10 ng/ml of PDGF and further analyzed for 15  
566 more hours. Images were taken every 5 min.

567



568 **References**

- 569 1. Sini, P., Cannas, A., Koleske, A.J., Di Fiore, P.P. & Scita, G. Abl-dependent  
570 tyrosine phosphorylation of Sos-1 mediates growth-factor-induced Rac  
571 activation. *Nat Cell Biol* **6**, 268-274 (2004).
- 572 2. Disanza, A. *et al.* Eps8 controls actin-based motility by capping the barbed  
573 ends of actin filaments. *Nat Cell Biol* **6**, 1180-1188 (2004).
- 574 3. Sastry, L. *et al.* Quantitative analysis of Grb2-Sos1 interaction: the N-terminal  
575 SH3 domain of Grb2 mediates affinity. *Oncogene* **11**, 1107-1112 (1995).
- 576 4. Innocenti, M. *et al.* Mechanisms through which Sos-1 coordinates the  
577 activation of Ras and Rac. *J Cell Biol* **156**, 125-136. (2002).
- 578 5. Scita, G. *et al.* EPS8 and E3B1 transduce signals from Ras to Rac. *Nature* **401**,  
579 290-293 (1999).
- 580 6. Innocenti, M. *et al.* Abi1 is essential for the formation and activation of a  
581 WAVE2 signalling complex. *Nat Cell Biol* **6**, 319-327 (2004).
- 582 7. Frittoli, E. *et al.* A RAB5/RAB4 recycling circuitry induces a proteolytic  
583 invasive program and promotes tumor dissemination. *J Cell Biol* **206**, 307-328  
584 (2014).
- 585 8. Illert, A.L. *et al.* Grb10 is involved in BCR-ABL-positive leukemia in mice.  
586 *Leukemia* **29**, 858-868 (2015).
- 587 9. van der Geer, P., Hunter, T. & Lindberg, R.A. Receptor protein-tyrosine  
588 kinases and their signal transduction pathways. *Annu Rev Cell Biol* **10**, 251-  
589 337 (1994).
- 590 10. Worthyake, D.K., Rossman, K.L. & Sondek, J. Crystal structure of Rac1 in  
591 complex with the guanine nucleotide exchange region of Tiam1. *Nature* **408**,  
592 682-688. (2000).
- 593 11. Palamidessi, A. *et al.* Endocytic trafficking of Rac is required for the spatial  
594 restriction of signaling in cell migration. *Cell* **134**, 135-147 (2008).
- 595 12. Baltanas, F.C. *et al.* Functional redundancy of Sos1 and Sos2 for  
596 lymphopoiesis and organismal homeostasis and survival. *Mol Cell Biol* **33**,  
597 4562-4578 (2013).
- 598 13. Miething, C. *et al.* The Bcr-Abl mutations T315I and Y253H do not confer a  
599 growth advantage in the absence of imatinib. *Leukemia* **20**, 650-657 (2006).
- 600 14. Innocenti, M. *et al.* Phosphoinositide 3-kinase activates Rac by entering in a  
601 complex with Eps8, Abi1, and Sos-1. *J Cell Biol* **160**, 17-23 (2003).
- 602 15. Scita, G. *et al.* An effector region in Eps8 is responsible for the activation of  
603 the Rac- specific GEF activity of Sos-1 and for the proper localization of the  
604 Rac-based actin-polymerizing machine. *J Cell Biol* **154**, 1031-1044. (2001).  
605
