# Supplementary figures and images for: Phosphorylation of SOS1 on tyrosine 1196 promotes its RAC GEF activity and contributes to BCR-ABL leukemogenesis
Source: PubMed Central journal article supplement — Leukemia. 2017 Sep 12;32(3):820–7. doi: 10.1038/leu.2017.267 (PMC5739283; doi:10.1038/leu.2017.267), 2017-09-12

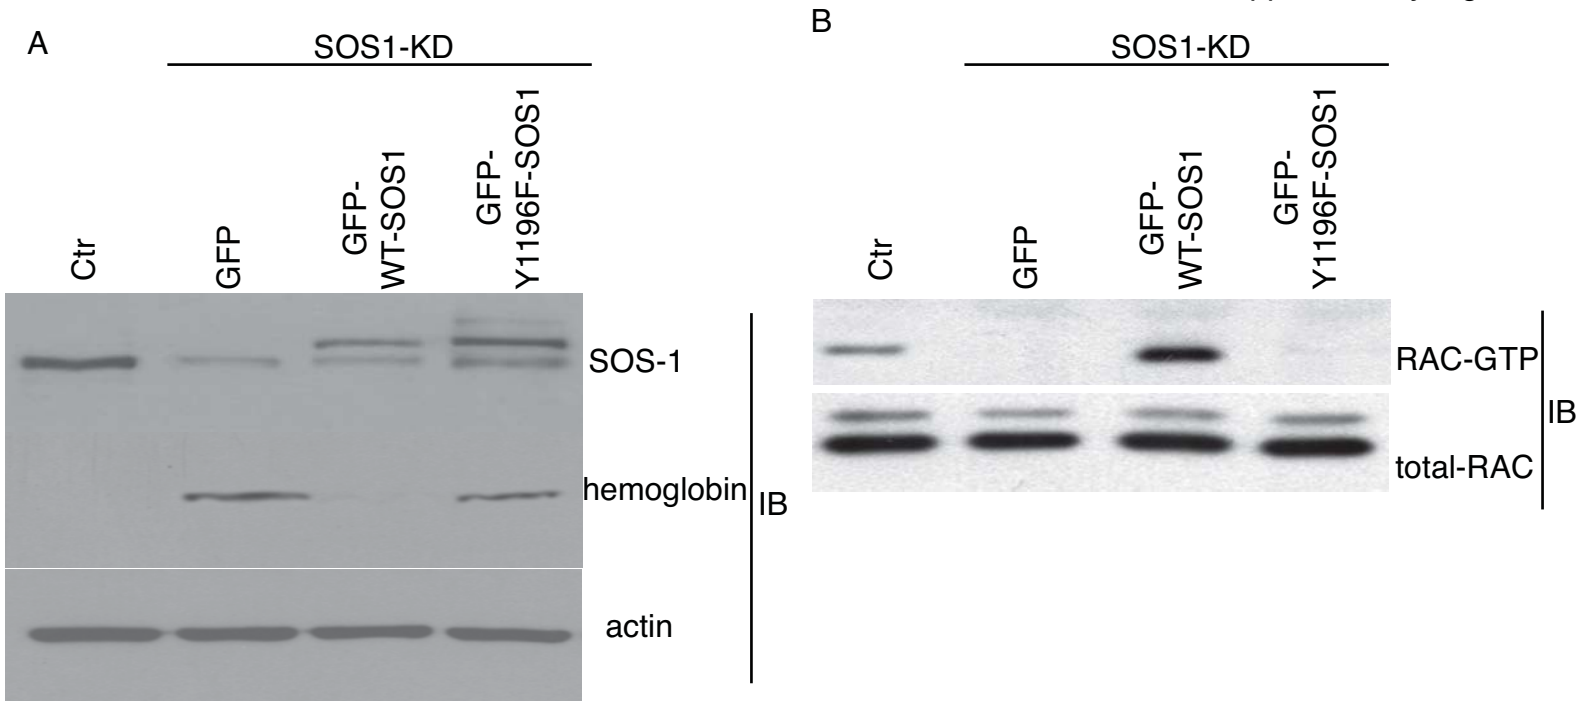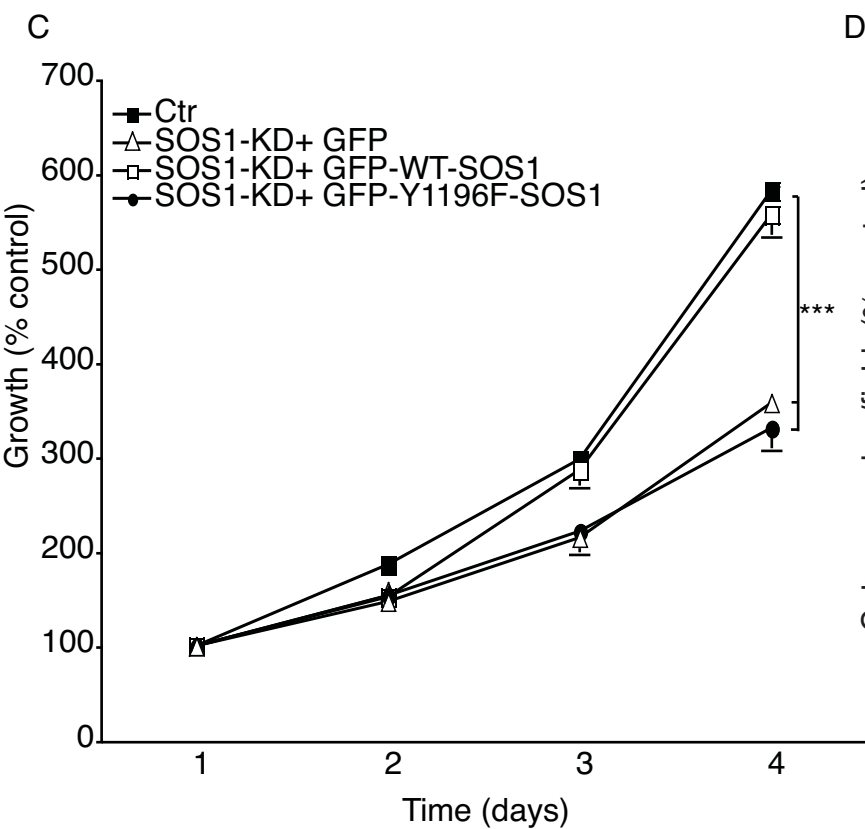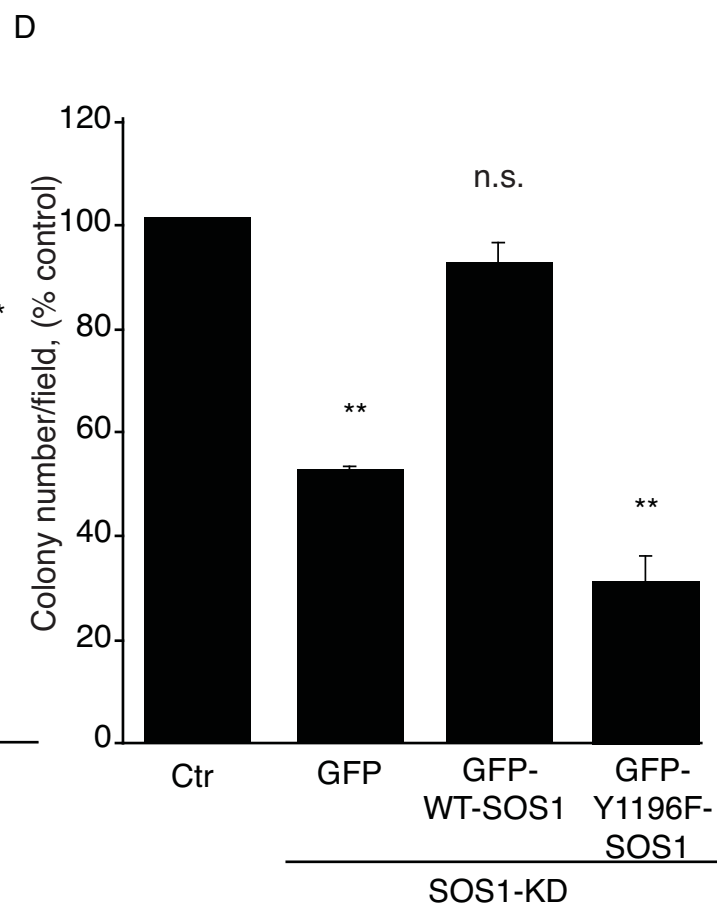

Supplement: NIHMS73768-supplement-Supplementary_Figure_S8.pdf [file NIHMS73768-supplement-Supplementary_Figure_S8.pdf]

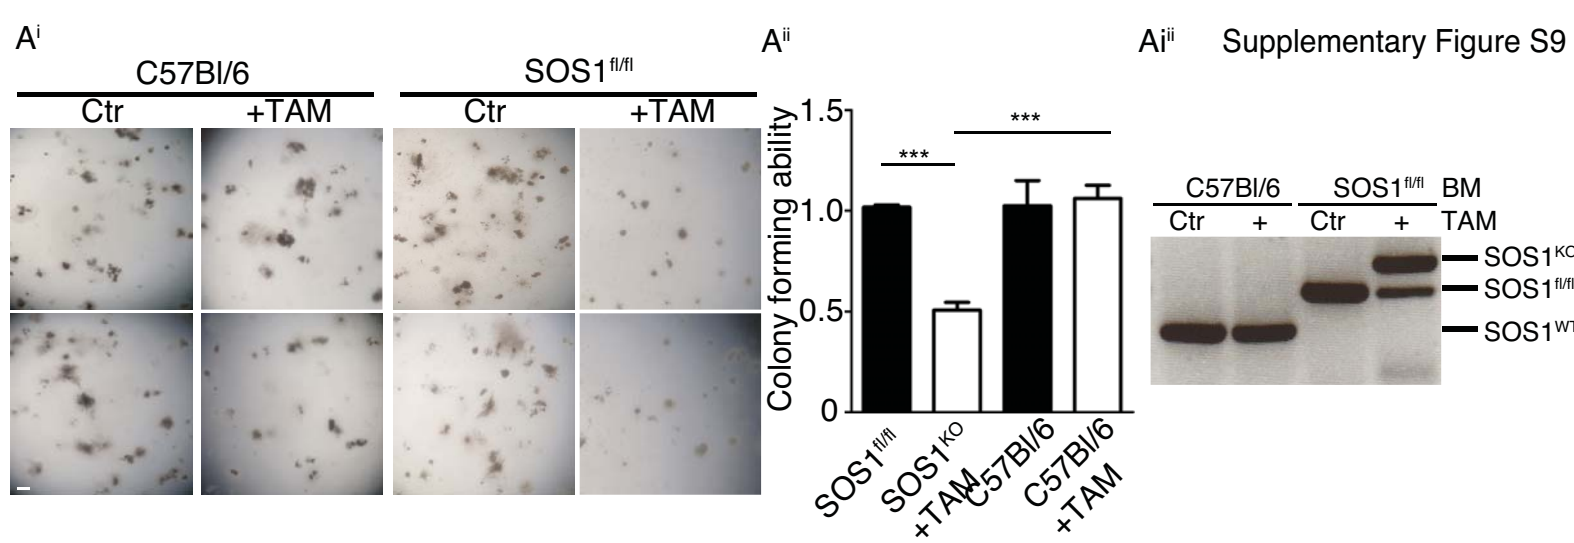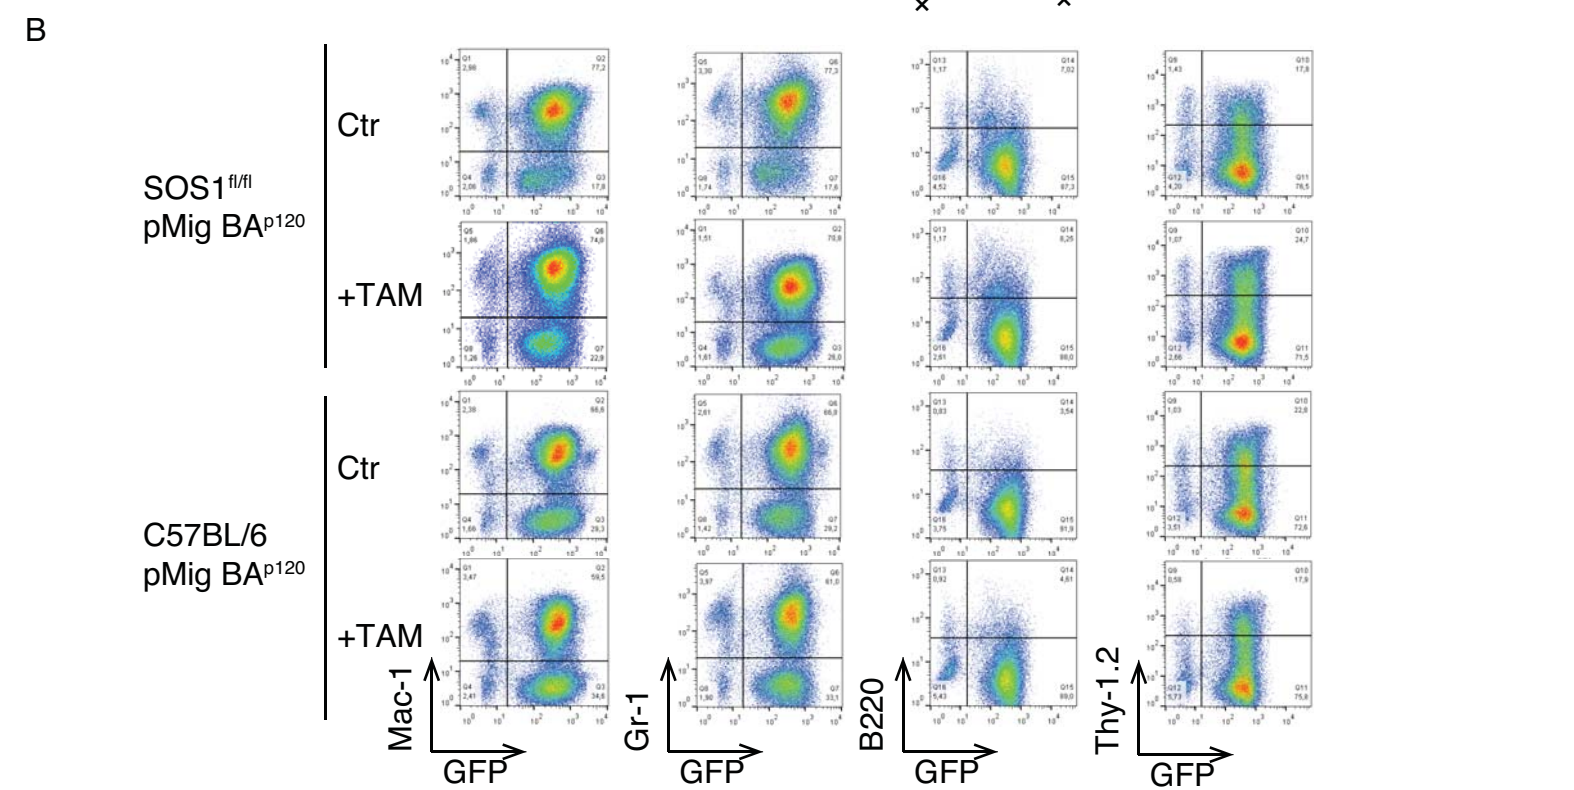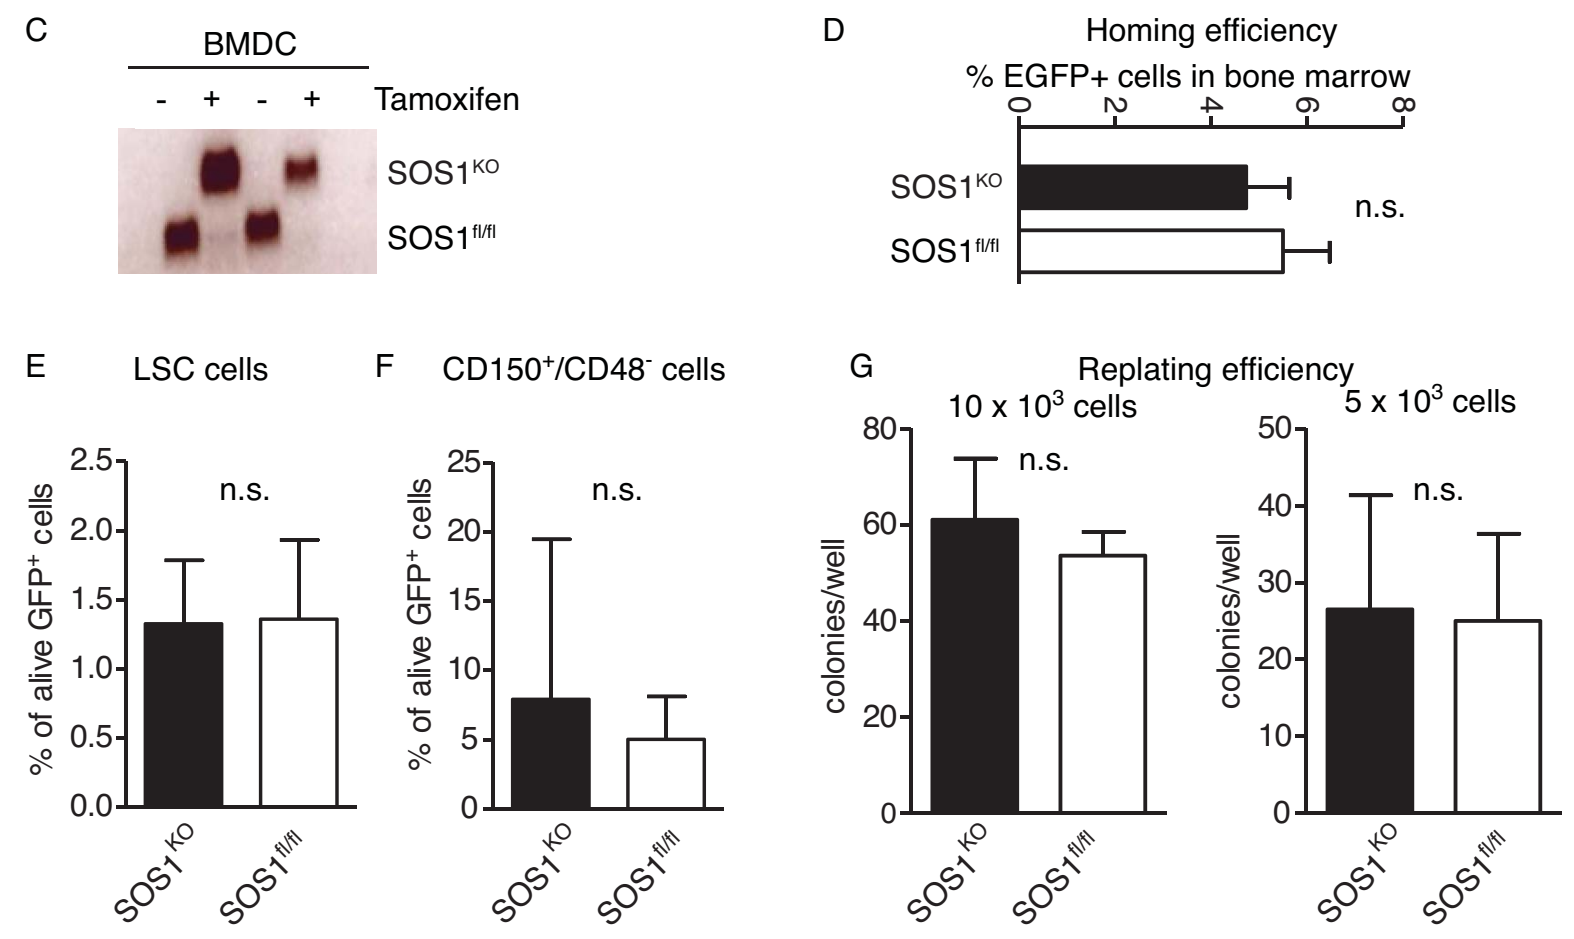

Supplement: NIHMS73768-supplement-Supplementary_Figure_S9.pdf [file NIHMS73768-supplement-Supplementary_Figure_S9.pdf]
